# Supplementary figures and images for: Frustration-driven allosteric regulation and signal transmission in the SARS-CoV-2 spike omicron trimer structures: a crosstalk of the omicron mutation sites allosterically regulates tradeoffs of protein stability and conformational adaptability
Source: Royal Society of Chemistry journal article supplement (doi:10.1039/d2cp01893d), 2022-01-01

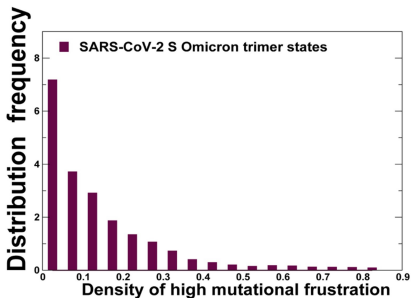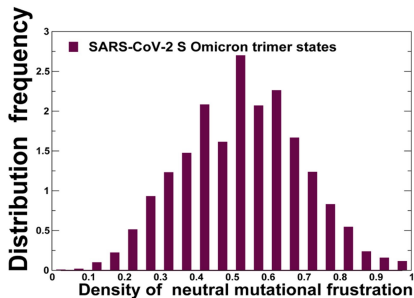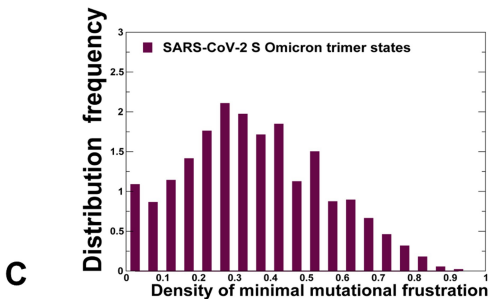

Supplement: d2cp01893d2.pdf [file d2cp01893d2.pdf]

**SARS-CoV-2 S Omicron  
3-RBD-down closed trimer**

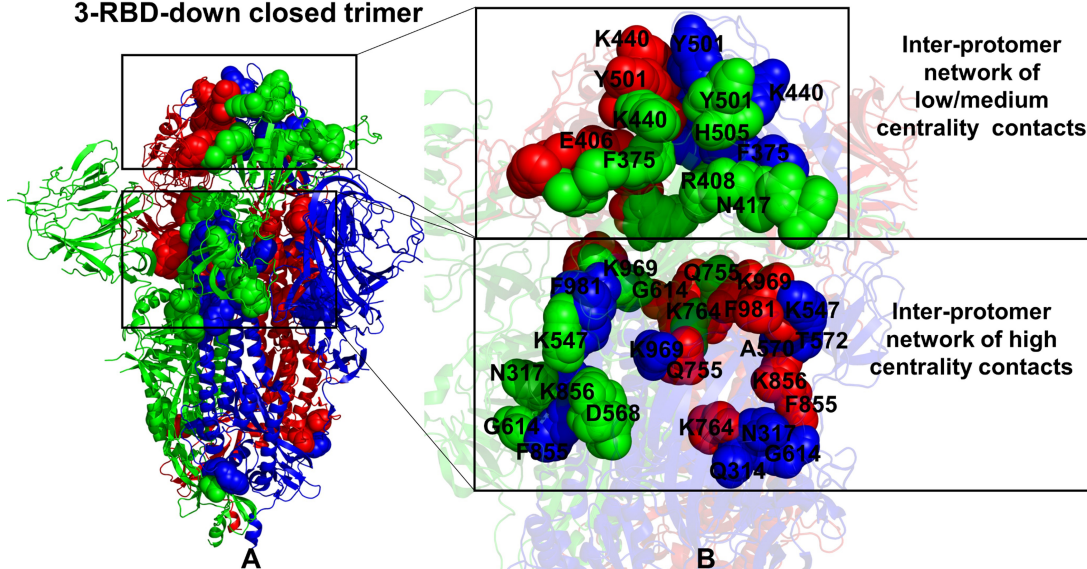

Supplement: d2cp01893d5.pdf [file d2cp01893d5.pdf]

**SARS-CoV-2 S Omicron  
1-RBD-up open trimer**

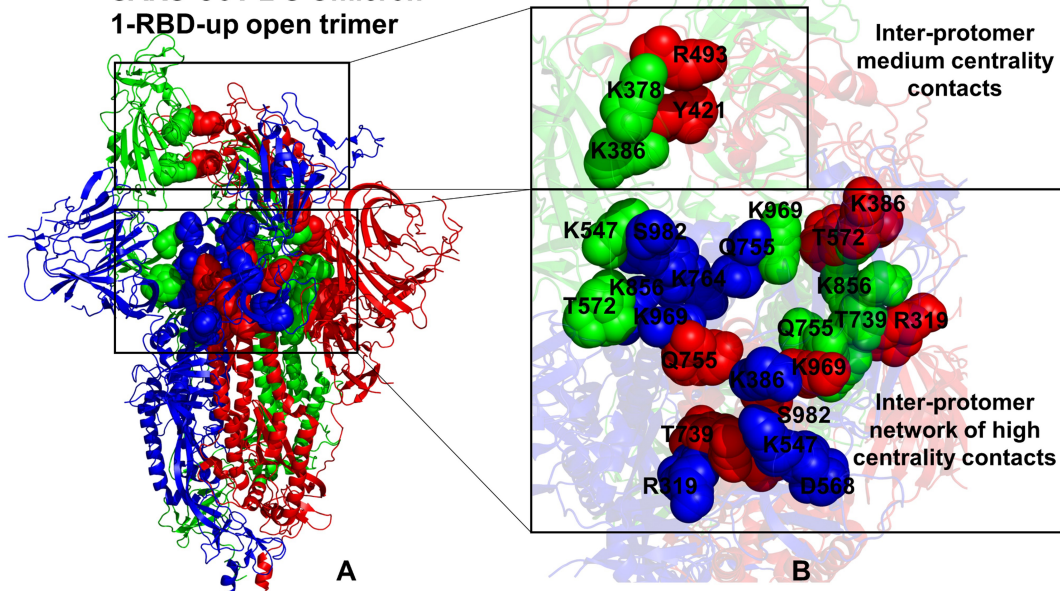

Supplement: d2cp01893d6.pdf [file d2cp01893d6.pdf]
